# Supplementary material for: Public willingness to participate in personalized health research and biobanking: A large-scale Swiss survey
Source: PubMed Central journal article supplement (PMC8016315; doi:10.1371/journal.pone.0249141), 2021-04-01
Supplement: pone.0249141.s006.pdf [file pone.0249141.s006.pdf]

**ETH**

Eidgenössische Technische Hochschule Zürich  
Swiss Federal Institute of Technology Zurich

**u<sup>b</sup>**

---

<sup>b</sup>  
**UNIVERSITÄT  
BERN**

Health Ethics & Policy Lab  
Chaire de bioéthique, ETH Zurich

Institut de médecine sociale et  
préventive  
Université de Berne

Tel: 044 505 15 13  
Email: persmed@ethz.ch

# Enquête Suisse

Votre point de vue sur la recherche  
en santé personnalisée

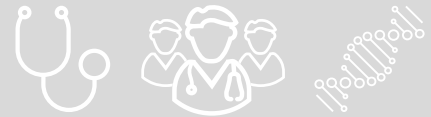

un sondage d'opinion de l'ETH Zurich, Health Ethics & Policy Lab et l'Université de Berne, Institut de médecine sociale et préventive

Sondage en ligne:

[www.persmed.ethz.ch](http://www.persmed.ethz.ch)

Mot de passe: XYZ

# Introduction

**Bienvenue à notre enquête sur la recherche en santé personnalisée!**

**Imaginez que vous êtes invité à participer à un projet de recherche en santé personnalisée financé par des fonds publics suisses. Ce projet hypothétique recueille des données sur votre santé.**

Les types de données recueillies sont des données personnelles (sexe, âge, poids, etc.), des données sur la santé (antécédents médicaux et dossiers médicaux) et des échantillons biologiques (sang, salive, urine, cheveux ou tissus), qui peuvent fournir des renseignements sur votre ADN. Dans ce qui suit, nous les appellerons données et échantillons.

Les données sont stockées dans une biobanque suisse. Il s'agit d'une vaste banque de données gérée par des centres de recherche publics tels que les universités. Les données sont confidentielles et sécurisées.

---

**Cette enquête vous demandera ce que vous pensez du fait de partager vos données personnelles, vos données de santé et vos échantillons biologiques avec une telle biobanque pour la recherche en santé personnalisée. Quelles seraient vos préoccupations ? Quelles seraient vos attentes ?**

Pour nous aider à comprendre ce qui est important pour vous, veuillez nous faire part de vos opinions et de votre point de vue sur la mise à disposition de données sur la santé et d'échantillons biologiques pour la recherche. L'enquête n'évalue pas ce que vous savez sur ces sujets. Veuillez répondre à l'enquête honnêtement et au mieux de vos capacités.

Merci d'avoir accepté de répondre au sondage !

---

## Informations supplémentaires :

Pourquoi des personnes atteintes d'une même maladie réagissent-elles si différemment aux traitements ? Pourquoi un médicament fonctionne-t-il très bien chez une personne et pas chez une autre ? Et pourquoi une personne développe-t-elle une maladie et une autre pas ?

La recherche en **santé personnalisée** veut répondre à ces questions afin de **traiter les malades de manière plus précise, personnalisée et efficace à l'avenir**. La recherche en santé personnalisée utilise également des renseignements génétiques et autres renseignements personnels sur des personnes en bonne santé pour en apprendre davantage sur les causes de certaines maladies et sur les risques de les développer.

Pour ce faire, il est important que les chercheurs aient accès au plus grand nombre possible de données sur la santé et d'échantillons de différentes personnes (ayant un état de santé différent) dans les biobanques qui sont constituées.

## Comment remplir le questionnaire

- Cochez la case appropriée à côté de la réponse choisie:
- Si vous avez coché la mauvaise case par erreur, remplissez-la complètement avec un stylo à bille, puis cochez la case appropriée.

# Partie 1: Votre attitude

Nous aimerions commencer par votre point de vue général sur les questions suivantes:

**Q1.** Avant aujourd'hui, avez-vous déjà entendu parler de la recherche sur des échantillons biologiques (p. ex. sang, salive, urine, cheveux ou tissus)?

Oui  Non

**Q2.** Quelle est votre opinion générale à l'égard de la recherche sur des échantillons biologiques humains (comme le sang, la salive, l'urine, les cheveux ou les tissus)?

Très négatif  Plutôt négatif  Indifférent  Plutôt positif  Très positif

**Q3.** Dans quelle mesure pensez-vous qu'il est important pour vous, votre famille ou la société que vous participiez à la recherche en mettant à disposition vos données de santé (antécédents médicaux et dossiers médicaux) et/ou vos échantillons biologiques (sang, salive, urine, cheveux ou tissus) ?

*Veillez noter sur une échelle de 1 = aucune valeur à 5 = valeur élevée.*

|                                   | 1                        | 2                        | 3                        | 4                        | 5                        | Je ne sais pas           |
|-----------------------------------|--------------------------|--------------------------|--------------------------|--------------------------|--------------------------|--------------------------|
| 1. Pour moi personnellement       | <input type="checkbox"/> | <input type="checkbox"/> | <input type="checkbox"/> | <input type="checkbox"/> | <input type="checkbox"/> | <input type="checkbox"/> |
| 2. Pour ma famille                | <input type="checkbox"/> | <input type="checkbox"/> | <input type="checkbox"/> | <input type="checkbox"/> | <input type="checkbox"/> | <input type="checkbox"/> |
| 3. Für die Gesellschaft allgemein | <input type="checkbox"/> | <input type="checkbox"/> | <input type="checkbox"/> | <input type="checkbox"/> | <input type="checkbox"/> | <input type="checkbox"/> |

**Q4.** Participeriez-vous à un projet de recherche qui utiliserait vos données sur la santé et/ou vos échantillons biologiques ?

Oui (passez à la question 4.1)

Non (passez à la question 5)

*Note : Même si vous avez répondu non à cette question, nous vous demandons de répondre à l'ensemble de ce sondage. Nous aimerions connaître votre opinion sur la meilleure façon d'organiser la recherche avec des données sur la santé et des échantillons biologiques en fonction de votre point de vue.*

**Q4.1** Quels types de données et d'échantillons seriez-vous prêt à mettre à disposition ?

*Veillez en choisir autant que possible.*

- Questionnaires sur mon état de santé
  - Dossiers médicaux me concernant (numériques ou sur papier)
  - Les antécédents médicaux de ma famille
  - Mon échantillon de sang
  - Mes échantillons biologiques que je peux prendre moi-même (par ex. salive, cheveux, urine, écouvillon buccal)
  - Mes échantillons biologiques qui doivent être prélevés par le personnel médical (p. ex. tissus tumoraux ou de peau)
  - Mes données sur les réseaux sociaux
  - Données dérivées d'applications sur ma santé ou mon mode de vie (p. ex. traceur d'exercice, journal alimentaire, fréquence cardiaque, etc.)
- 

**Q4.2** Quelles raisons influencent votre participation à cette recherche ?

*Veillez sélectionner jusqu'à 3 plus pertinentes.*

- Pour accroître les connaissances scientifiques
  - Être au service de la société et des générations futures
  - Par sens général du devoir
  - Pour améliorer l'ensemble des soins de santé
  - Pour obtenir un avantage personnel en apprenant quelque chose sur ma santé
  - Pour le bien de ma famille (pour connaître les maladies génétiquement transmissibles)
  - Autre raison (veuillez préciser) : \_\_\_\_\_
  - Je ne sais pas
- 

**Q5.** Lesquelles des préoccupations suivantes avez-vous ?

*Veillez sélectionner jusqu'à 3 plus pertinentes.*

- Je m'inquiète de la recherche impliquant des informations sur mes gènes
- J'ai peur de ce que je pourrais découvrir sur mes propres risques pour la santé
- Je m'inquiète que la confidentialité de mes données ne soit pas préservée
- J'ai m'inquiète que quelqu'un pirate et vole mes données
- Je m'inquiète que quelqu'un utilise mes données à des fins discriminatoires à mon encontre ou à l'encontre de ma famille (par exemple, par les assurances maladie ou les services financiers)

- Je m'inquiète que mes données et échantillons soient utilisés à des fins commerciales ou de marketing plutôt que de recherche
- Je refuse que d'autres personnes (comme des entreprises privées ou des chercheurs) profitent financièrement de mes données
- J'ai peur des aiguilles ou des procédures pour obtenir les échantillons
- Je ne veux pas faire l'effort nécessaire pour participer
- Je ne reçois pas d'argent pour cela
- Je n'ai pas le temps de contribuer
- Je me fiche de la recherche en santé
- Aucune raison particulière
- Autre (veuillez préciser):

---

---

**Q6.** Si, hypothétiquement, vous faisiez don de vos données et/ou échantillons à une biobanque ou :  
quelles informations souhaitez-vous recevoir à l'avance ?

*Veuillez sélectionner jusqu'à 3 types d'informations les plus importants pour vous.*

- Les types exacts de recherche qui seront effectués
- Les avantages et les risques potentiels du don de mes données et/ou échantillons
- La manière dont les données et les échantillons sont stockés, telle que rendus anonymes, codés ou stockés avec mon nom
- Qui a accès à mes données et échantillons
- Qui bénéficiera de la recherche
- Qui tirera un profit financier de la recherche
- Les mesures de sécurité pour préserver la confidentialité et la protection des données et des échantillons
- Aucune de ces informations ne m'aiderait à décider
- Autre (veuillez préciser) :

---

---

---

## Partie 2: Gestion des données et des échantillons

Dans cette partie, nous aimerions savoir comment vous pensez que les données et les échantillons mis à disposition devraient être gérés.

**Q7.** Les biobanques aimeraient pouvoir utiliser vos données et échantillons dans de multiples projets de recherche, même à l'avenir. À quelle fréquence aimeriez-vous que la biobanque vous demande la permission d'utiliser vos données et échantillons dans le cadre de projets de recherche ? (Sachant que votre décision peut toujours être modifiée ou votre accord retire.)

Ne me demandez qu'une seule fois, lorsque je mets à disposition mes données et/ou échantillons

Redemandez-moi pour chaque nouveau projet

Cela dépendrait du type de projet à l'étude

Je ne sais pas

**Q8.** Sous quelle forme préféreriez-vous que vos données et échantillons soient conservés?

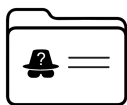

**Anonyme**

Explication :

Les données et les échantillons qui sont anonymisés ne peuvent pas être liés à une personne spécifique sans efforts considérables.

Cela signifie que les identifiants - tels que votre nom, votre adresse, vos photos - sont supprimés de vos données.

Conséquences :

→ Vous ne recevrez que les résultats généraux du projet de recherche.

Risque d'entrave à la vie privée:

Faible

(Les risques pour votre vie privée sont limités, car il est très difficile d'établir un lien entre vos données et vous.)

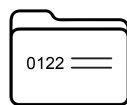

**Codée**

Explication :

Les données et les échantillons sont reliés à une personne spécifique par l'intermédiaire d'un code, lequel est stocké en toute sécurité par les chercheurs. Cela signifie qu'un code ou une clé est nécessaire pour relier les données à vous.

Conséquences :

→ Vous recevez des résultats individuels sur votre statut personnel, en plus des résultats généraux du projet de recherche.

Risque d'entrave à la vie privée:

Moyen

(Les risques pour votre vie privée sont limités, car vos données ne peuvent être identifiées qu'à l'aide d'un code sécurisé.)

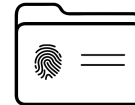

**Identifiable**

Explication :

Les données et les échantillons sont stockés ensemble et étiquetés à votre nom. Ils peuvent facilement être reliés à vous.

Conséquences :

→ Vous recevez des résultats individuels sur votre statut personnel, en plus des résultats généraux du projet de recherche.

Risque d'entrave à la vie privée: Élevé

(Votre vie privée peut être menacée, car il est facile d'identifier vos données.)

**Q9.** Selon vous, à qui devraient appartenir les données et les échantillons que vous donnez à une biobanque ?

*Veillez choisir une seule réponse.*

A moi personnellement

A la biobanque

Au gouvernement suisse

Aux universités impliquées dans la biobanque

Aux chercheurs spécifiques qui font des découvertes

A personne

Autre (veuillez préciser): \_\_\_\_\_

Je ne sais pas

---

## Partie 3: Gouvernance et partage des données

A présent, nous aimerions savoir comment vous pensez que les données et les échantillons devraient être gérés et partagés.

**Q10.** Selon vous, qui devrait être responsable de s'assurer que vos données et échantillons sont correctement stockés et gérés ?

*Veillez choisir une réponse.*

- La biobanque (conseil d'administration)
- Un comité indépendant représentant le public (p. ex. les citoyens, les patients, le public)
- Un comité d'experts indépendants (p. ex. chercheurs indépendants : scientifiques et cliniciens non associés à la biobanque)
- Un comité mixte de citoyens et d'experts
- Autre (veuillez préciser): \_\_\_\_\_

**Q11.** Imaginez que les personnes et organisations suivantes en Suisse aient accès à vos données et échantillons dans la biobanque. Dans quelle mesure auriez-vous confiance qu'ils garderont vos données et échantillons confidentiels et protégés ?

*Veillez évaluer sur une échelle allant de 1 = aucune confiance à 5 = confiance forte.*

|                                          | 1                        | 2                        | 3                        | 4                        | 5                        |
|------------------------------------------|--------------------------|--------------------------|--------------------------|--------------------------|--------------------------|
| Mon médecin                              | <input type="checkbox"/> | <input type="checkbox"/> | <input type="checkbox"/> | <input type="checkbox"/> | <input type="checkbox"/> |
| Médecins en général                      | <input type="checkbox"/> | <input type="checkbox"/> | <input type="checkbox"/> | <input type="checkbox"/> | <input type="checkbox"/> |
| Chercheurs universitaires                | <input type="checkbox"/> | <input type="checkbox"/> | <input type="checkbox"/> | <input type="checkbox"/> | <input type="checkbox"/> |
| Chercheurs d'autres institutions publics | <input type="checkbox"/> | <input type="checkbox"/> | <input type="checkbox"/> | <input type="checkbox"/> | <input type="checkbox"/> |
| Entreprises pharmaceutiques              | <input type="checkbox"/> | <input type="checkbox"/> | <input type="checkbox"/> | <input type="checkbox"/> | <input type="checkbox"/> |
| Autres entreprises multi-nationales      | <input type="checkbox"/> | <input type="checkbox"/> | <input type="checkbox"/> | <input type="checkbox"/> | <input type="checkbox"/> |
| Autres entreprises suisses               | <input type="checkbox"/> | <input type="checkbox"/> | <input type="checkbox"/> | <input type="checkbox"/> | <input type="checkbox"/> |
| Assurances maladie                       | <input type="checkbox"/> | <input type="checkbox"/> | <input type="checkbox"/> | <input type="checkbox"/> | <input type="checkbox"/> |
| Gouvernement suisse                      | <input type="checkbox"/> | <input type="checkbox"/> | <input type="checkbox"/> | <input type="checkbox"/> | <input type="checkbox"/> |



# Partie 4: Utilité de recevoir des résultats médicaux personnellement pertinents

Dans cette partie, nous aimerions savoir quels résultats de recherche vous aimeriez recevoir si vous avez mis à disposition des données et des échantillons à une étude.

**Q12.** Imaginez que vous avez participé à l'étude d'une biobanque et qu'il est possible d'obtenir des résultats de recherche personnels : quels types de résultats de recherche aimeriez-vous recevoir ?

|                                                                                                                                                                                                                                                                         | Oui                      | Non                      | Je ne sais pas           |
|-------------------------------------------------------------------------------------------------------------------------------------------------------------------------------------------------------------------------------------------------------------------------|--------------------------|--------------------------|--------------------------|
| 1. Renseignements médicaux de base, p. ex. résultats de laboratoire comme les valeurs de sang                                                                                                                                                                           | <input type="checkbox"/> | <input type="checkbox"/> | <input type="checkbox"/> |
| 2. Comment mon mode de vie influe-t-il sur mon risque de santé (p. ex., tabagisme, poids, etc.)                                                                                                                                                                         | <input type="checkbox"/> | <input type="checkbox"/> | <input type="checkbox"/> |
| 3. Résultats sur les risques de maladies pour lesquelles il existe des traitements médicaux (p. ex. risque de certains types de cancer, certains problèmes cardiaques)                                                                                                  | <input type="checkbox"/> | <input type="checkbox"/> | <input type="checkbox"/> |
| 4. Résultats sur les risques de maladies pour lesquelles seules des actions préventives peuvent être entreprises (par exemple, le risque de diabète ou de maladies cardiovasculaires)                                                                                   | <input type="checkbox"/> | <input type="checkbox"/> | <input type="checkbox"/> |
| 5. Résultats sur les risques de maladies pour lesquelles aucun traitement médical n'est disponible, mais qui pourraient avoir une incidence sur mon bien-être ou sur mes décisions de carrière ou planification familiale (p. ex. la maladie d'Alzheimer ou la démence) | <input type="checkbox"/> | <input type="checkbox"/> | <input type="checkbox"/> |
| 6. Résultats de recherche généraux (les résultats ne s'appliquent pas spécifiquement à moi)                                                                                                                                                                             | <input type="checkbox"/> | <input type="checkbox"/> | <input type="checkbox"/> |

**Q13.** Parfois, les résultats génétiques du développement d'une maladie ne peuvent être exprimés qu'en pourcentage. A quel niveau de probabilité voudriez-vous connaître les résultats ?

*Ich möchte Ergebnisse zu meinen Krankheitsrisiken erhalten...*

- Je ne veux recevoir les résultats que si j'aurai **définitivement** la maladie.
- Je veux recevoir les résultats lorsqu'il est **très probable** que j'attrape la maladie.
- Je veux recevoir les résultats quand c'est **possible, mais pas très probable** que j'attrape la maladie.
- Je ne veux pas recevoir de résultats sur les probabilités de maladies.
- Je ne sais pas.

**Q14.** Si vous voulez recevoir des résultats, par quel canal souhaiteriez-vous les recevoir ?

*Veillez cocher toutes les réponses qui s'appliquent.*

- Lettre par la poste
  - Appel téléphonique
  - E-Mail
  - Site Web avec connexion sécurisée
  - Application mobile
  - Communication personnelle (face à face)
- 

**Q15.** Dans quelle mesure l'argent ou toute autre compensation matérielle serait-il important pour vous pour vous motiver à mettre à disposition vos données et/ou échantillons à une biobanque suisse financée par des fonds publics ?

*Veillez évaluer sur une échelle de 1 = pas important à 5 = très important.*

- |                          |                          |                          |                          |                          |
|--------------------------|--------------------------|--------------------------|--------------------------|--------------------------|
| 1                        | 2                        | 3                        | 4                        | 5                        |
| <input type="checkbox"/> | <input type="checkbox"/> | <input type="checkbox"/> | <input type="checkbox"/> | <input type="checkbox"/> |
-

# Dernière partie : Renseignements personnels

Dans cette dernière partie, nous vous demandons de fournir quelques informations vous concernant.

**Q16.** Comment décririez-vous votre état de santé général?

- Très mauvais       Plutôt mauvais       Neutre       Assez bon       Excellent
- 

**Q17.** Quel âge avez-vous?

- 18-24       35-44       55-64       75 ou plus âgé  
 25-34       45-54       65-74
- 

**Q18.** Was ist Ihr Geschlecht?

- Homme       Autre  
 Femme       Préfère ne pas le divulguer
- 

**Q19.** Avez-vous des enfants biologiques?

- Oui       Non
- 

**Q20.** Quelle est votre nationalité (pays)?

*Veillez cocher toutes les réponses qui s'appliquent.*

- Suisse       Allemagne       Kosovo  
 Italie       Portugal       Autre (veuillez préciser) :  
 France       Espagne      \_\_\_\_\_
- 

**Q21.** Quel est votre plus haut niveau d'éducation?

- Aucune ou jusqu'à 7 ans d'études obligatoires  
 École obligatoire (8 ou 9 ans)  
 Formation professionnelle de base / apprentissage  
 École secondaire (Maturité)  
 Formation professionnelle supérieure / apprentissage ou école technique  
 Diplôme universitaire (Bachelor / Master / Doctorat)
-

**Q22.** Travaillez-vous ou avez-vous déjà travaillé dans le secteur des soins, de la santé, ou de la recherche sur la santé?

Oui

Non

---

**Q23.** Vous décririez-vous comme une personne religieuse?

Tout à fait

Un peu

Pas du tout

---

Remarques générales :

---

### **Fin de l'enquête**

Merci beaucoup d'avoir pris le temps de répondre à ce sondage!  
Nous apprécions grandement votre précieuse contribution!

---

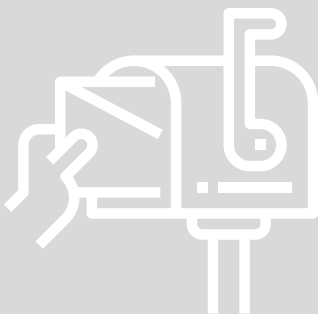

Veillez renvoyer le questionnaire complété avant le 23 novembre 2019 à l'adresse suivante. Pour ce faire, vous pouvez utiliser l'enveloppe préaffranchie ci-jointe.

Health Ethics and Policy Lab  
ETH Zürich  
Hottingerstrasse 10  
8092 Zürich
