# Supplementary material for: Public willingness to participate in personalized health research and biobanking: A large-scale Swiss survey
Source: PubMed Central journal article supplement (PMC8016315; doi:10.1371/journal.pone.0249141), 2021-04-01
Supplement: pone.0249141.s011.pdf [file pone.0249141.s011.pdf]

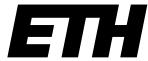

Eidgenössische Technische Hochschule Zürich  
Swiss Federal Institute of Technology Zurich

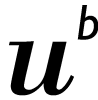

b  
UNIVERSITÄT  
BERN

Health Ethics & Policy Lab  
Lehrstuhl für Bioethik, ETH Zürich

Institut für Sozial- und Präventivmedizin  
Universität Bern

Tel: 044 505 15 13  
Email: persmed@ethz.ch

Herr /Frau  
Name  
Straße  
Ort

Zürich, 7. Oktober 2019

## Ihre Meinung zu personalisierter Gesundheitsforschung: Erinnerung zur Teilnahme an der Umfrage

Sehr geehrte/r Herr /Frau XXX

Vor drei Wochen haben wir Sie zu einer Meinungsumfrage der ETH Zürich und Universität Bern zum Thema *Personalisierte Gesundheitsforschung* eingeladen. Wir erlauben uns, Sie noch einmal höflich um Ihre Teilnahme an dieser Umfrage zu bitten. Das Ausfüllen dauert nur etwa 15 bis 20 Minuten. Falls Sie zwischenzeitlich bereits teilgenommen haben, bitten wir Sie, dieses Schreiben nicht weiter zu beachten und danken Ihnen sehr herzlich für Ihr Mitwirken.

Wir haben Sie und die anderen Befragten per Zufall aus der Schweizer Bevölkerung ausgewählt. Hierdurch wollen wir sicher stellen, dass alle Meinungen zum Thema *Personalisierte Gesundheitsforschung* Gehör finden. Ihre Antworten werten wir anonym aus, d.h. es sind keine Rückschlüsse auf Sie persönlich möglich. Wir verfolgen keine kommerziellen, sondern rein wissenschaftliche und gesellschaftliche Ziele. Abgesehen von der ETH Zürich und Universität Bern sind keine weiteren Kooperationspartner involviert.

Zur Umfrage gelangen Sie über folgenden Link: [www.persmed.ethz.ch](http://www.persmed.ethz.ch)

Passwort: **PASSWORT/TOKEN**

Wenn Sie Fragen haben, können Sie uns über die E-Mail-Adresse persmed@ethz.ch oder telefonisch unter 044 505 15 13 erreichen.

Wir hoffen, dass wir auf Ihre Teilnahme zählen dürfen und danken Ihnen bereits jetzt für Ihren wertvollen Beitrag!

Mit freundlichen Grüssen

Prof. Dr. Effy Vayena  
Health Ethics and Policy Lab  
ETH Zürich

Prof. Dr. Matthias Egger  
Institut für Sozial- und Präventivmedizin  
Universität Bern
