# Supplementary material for: Public willingness to participate in personalized health research and biobanking: A large-scale Swiss survey
Source: PubMed Central journal article supplement (PMC8016315; doi:10.1371/journal.pone.0249141), 2021-04-01
Supplement: pone.0249141.s013.pdf [file pone.0249141.s013.pdf]

Signor / Signora  
Nome  
Via  
Luogo

Zurigo, 07 Ottobre 2019

**Il suo punto di vista sulla *medicina personalizzata*: Promemoria per partecipare al sondaggio**

Gentile Signor / Signora XXX

Tre settimane fa la abbiamo invitata/o a partecipare ad un sondaggio d'opinione sulla medicina personalizzata condotta dal Politecnico di Zurigo e dall'Università di Berna. Ci permettiamo di invitarla gentilmente a completare il questionario. Ci vogliono solo dai 15 ai 20 minuti per completarlo.

Se ha già completato il questionario, non serve che lei presti ulteriore attenzione a questa lettera e la ringraziamo per la sua collaborazione.

Abbiamo selezionato lei e gli altri intervistati in modo casuale tra la popolazione svizzera. In questo modo, vogliamo garantire che tutte le opinioni sul tema della medicina personalizzata siano raccolte. Analizzeremo le sue risposte in forma anonima; pertanto, non ci sarà possibile trarre conclusioni personali su di lei. Non perseguiamo obiettivi commerciali, ma puramente scientifici e sociali. Oltre al Politecnico di Zurigo e all'Università di Berna, non sono coinvolti altri partner che cooperano a questo progetto.

Il seguente link le permetterà di accedere al sondaggio: **[/www.persmed.ethz.ch](http://www.persmed.ethz.ch)**

Password: **PASSWORD/TOKEN**

In caso di ulteriori domande, può contattarci via e-mail all'indirizzo persmed@ethz.ch o per telefono al numero 044 505 15 15 13.

Speriamo di poter contare sulla sua partecipazione e la ringraziamo in anticipo per il suo prezioso contributo!

Cordiali Saluti,



Prof. Dr. Effy Vayena  
Health Ethics and Policy Lab  
ETH Zurigo



Prof. Dr. Matthias Egger  
Istituto di medicina sociale e preventiva  
Università di Berna
