# Supplementary material for: Public willingness to participate in personalized health research and biobanking: A large-scale Swiss survey
Source: PubMed Central journal article supplement (PMC8016315; doi:10.1371/journal.pone.0249141), 2021-04-01
Supplement: pone.0249141.s016.pdf [file pone.0249141.s016.pdf]

Signor / Signora  
Nome  
Via  
Luogo

Zurigo, 29 Ottobre 2019

**Il suo punto di vista sulla *medicina personalizzata*: Promemoria per partecipare al sondaggio**

Egregio Signore / Gentile Signora XXX

A Settembre l'abbiamo invitata a partecipare ad un sondaggio d'opinione sulla medicina personalizzata. Vorremmo chiederle di nuovo di partecipare a questo sondaggio. Ci vogliono solo dai 15 ai 20 minuti per completarlo.

Se nel frattempo avesse già completato il questionario, la ringraziamo per la sua collaborazione.

Per facilitare la sua partecipazione, il questionario è allegato in forma cartacea. Le saremmo molto grati se potesse completarlo e restituirlo entro il 23 novembre 2019 utilizzando la busta di risposta preaffrancata allegata. Naturalmente, è ancora possibile completare il sondaggio online all'indirizzo:

**[www.persmed.ethz.ch](http://www.persmed.ethz.ch)**

La sua password è: **PASSWORT/TOKEN**

Il suo nominativo è stato scelto a caso all'interno della popolazione svizzera. Analizzeremo le sue risposte in forma anonima; pertanto, non ci sarà possibile trarre conclusioni personali su di lei. Non perseguiamo obiettivi commerciali, ma puramente scientifici e sociali. Oltre al Politecnico di Zurigo e all'Università di Berna, non sono coinvolti altri partner che cooperano a questo progetto.

In caso di ulteriori domande, può contattarci via e-mail all'indirizzo persmed@ethz.ch, o per telefono al numero 044 505 15 13.

Speriamo di poter contare sulla sua partecipazione e la ringraziamo in anticipo per il suo prezioso contributo!

Cordiali Saluti,



Prof. Dr. Effy Vayena  
Health Ethics and Policy Lab  
ETH Zurigo



Prof. Dr. Matthias Egger  
Istituto di medicina sociale e preventiva  
Università di Berna
